# Supplementary material
Source: PubMed Central journal article supplement (PMC11388566)
Supplement: PBI-16-1227-s001.pdf [file PBI-16-1227-s001.pdf]

# **Overexpression of the class I homeodomain transcription factor TaHDZipI-5 increases drought and frost tolerance in transgenic wheat**

Yunfei Yang, Sukanya Luang<sup>†</sup>, John Harris<sup>††</sup>, Matteo Riboni, Yuan Li, Natalia Bazanova<sup>‡</sup>, Maria Hrmova\*, Stephan Haefele<sup>‡‡</sup>, Nataliya Kovalchuk, Sergiy Lopato

University of Adelaide, School of Agriculture, Food and Wine, Glen Osmond, SA 5064, Australia

\*Correspondence: maria.hrmova@adelaide.edu.au; Tel: +61 8 8313 7160; Fax: +61 8 8313 7102

Current addresses:

<sup>†</sup>Institute of Molecular Biosciences, Mahidol University, Nakhon-Pathom, Thailand

<sup>††</sup>South Australian Research and Development Institute, GPO Box 397, Adelaide, SA 5064, Australia

<sup>‡</sup>Commonwealth Scientific and Industrial Research Organisation, Glen Osmond, SA 5064, Australia

<sup>‡‡</sup>Rothamsted Research, West Common Harpenden, Hertfordshire, AL5 2JQ, UK

## **Supplementary data**

### **Supplementary materials and methods**

*Analysis of gene expression by quantitative real-time PCR (Q-PCR)*

Expression of the transgene in unstressed and cold (4°C) treated leaves of transgenic plants was demonstrated in different generations by Q-PCR (Fletcher, 2014). Total RNA was extracted

from tissues using TRIzol® Reagent (Life Technologies Corporation, Grand Island, NY, USA). Complementary DNA (cDNA) was synthesized from RNA as a template *via* reverse transcription (Fletcher, 2014). cDNA quality was assessed by reverse transcription polymerase chain reaction (RT-PCR) with intron-spanning primers of the wheat house-keeping gene *calreticulin* (*TaCRT*) (Table S1). To determinate the transgene expression level, Q-PCR was performed with primers of the target gene *TaHDZipI-5* (Table S1), described by Ferdous *et al.* (2015). Three out of four optimised wheat house-keeping genes, *TaActin*, *TaCyclophilin*, *TaGAPdH* and *TaEFA*, were used for transgene expression normalisation (Table S1). All experiments were carried out with three biological and three technical replicates.

*Cloning of TdHDZipI-5A and TdHDZipI-5B promoters and the identification of abscisic acid (ABA)-responsive cis-elements*

A fragment of the coding region of *TaHDZipI-5* (GeneBank accession KT224376) was isolated by PCR, using full-length cDNA as a template. It was used as a probe to screen a BAC library prepared from genomic DNA of *Triticum turgidum L. ssp. durum cv. Langdon* (Cenci *et al.*, 2003), as described by Kovalchuk *et al.* (2009). Both durum wheat homeologues of the *TaHDZipI-5* gene were identified by PCR using DNA of selected BAC clones as templates, and primers were derived from the coding region of *TaHDZipI-5* cDNA. Genes of the *T. turgidum ssp durum*, orthologues of *TaHDZipI-5*, are designated as *TdHDZipI-5A* and *TdHDZipI-5B*. The promoter sequences were identified through sequencing of BAC clones as described by Kovalchuk *et al.* (2009). Approximately 1300-bp-long fragments of the *TdHDZipI-5* promoter sequences were used for promoter analyses. These were cloned into the pENTR-D-TOPO vector, verified by sequencing and re-cloned into pMDC164 (Curtis and Grossniklaus, 2003) upstream of the *GUS* reporter gene. Sequences of the promoters were aligned using LALIGN version 2.1u09 (Huang and Miller, 1991). Potential ABA responsive

*cis*-elements of promoters were predicted (PLACE software; Higo *et al.*, 1999). Forward primers (Table S1) were designed to prevent interruptions of potential ABA responsive *cis*-elements; four 5'-deletions of the *TdHDZipI-5A* promoter, which included 5'UTRs, were generated by PCR. PCR products were cloned into the pENTR-D-TOPO vector (Invitrogen, Melbourne, Victoria, Australia), confirmed by sequencing and transferred by recombination into pMDC164; these were designated as *TdHDZipI-5A* D1, (1,055 bp), D2 (366 bp), D3 (336 bp), and D4 (175 bp), respectively. The identification of functional *cis*-elements responsible for ABA-induced activation of the *TdHDZipI-5A* promoter by deletions, was performed using a transient expression assay based on the biolistic bombardment of cultured wheat cells (Eini *et al.*, 2013). After one hour of cell recovery following bombardment, the liquid medium was exchanged for the same medium containing 0.5 mM ABA. Blue GUS foci were numbered after 24 hours of incubation with ABA.

#### *Analysis of evolutionary relationship of selected HD-Zip I $\gamma$ -clade proteins*

HD-Zip I  $\gamma$ -clade protein sequences from *Arabidopsis* (Henriksson *et al.*, 2005) and selected monocots (Agalou *et al.*, 2008; Harris *et al.*, 2016; Hu *et al.*, 2012; Zhao *et al.*, 2011) were derived from the Plant Transcription Factor Database (Jin *et al.*, 2017) and EST database at National Center for Biotechnology Information. Multiple sequence alignments (Table S2) were performed using the MAFFT version 7 algorithm online (Kato and Standley, 2013). A phylogenetic tree was constructed with the Neighbour Joining (NJ) algorithm, p-distance and the bootstrap method (1000 replicates of bootstrap) in the Molecular Evolutionary Genetics Analysis version 6 (MEGA6) program (Tamura *et al.*, 2013).

#### *In-yeast activation assay*

A transactivation assay in yeast was used to identify the activation domain of TaHDZipI-5. The full-length open reading frame (ORF) or various truncated fragments of *TaHDZipI-5* were individually fused in frame with the yeast GAL4 DNA-binding domain in the pGBKT7 vector (Invitrogen, Victoria, Australia). Constructs were transformed into yeast (*Saccharomyces cerevisiae* strain AH109). Transformed yeast cells were examined on synthetic defined (SD) (-Trp) medium and replica-plated to SD (-Trp / -His) medium. Yeast growth on the SD medium reflected the growth of yeast containing the native activation domain in truncated TaHDZipI-5 sequences.

*Construction of 3D models of homeodomains (HDs) of TaHDZipI-5 in homo- and hetero-dimeric forms in complex with the HDZ1 cis-element*

Structural models of homo-dimeric TaHDZipI-5 HDs and hetero-dimeric TaHDZipI-3/TaHDZipI-5 HDs were constructed using the crystal structure of *Drosophila melanogaster* HD (PDB: 1JGG) as a template (Hirsch and Aggarwal, 1995), through the MODELLER program suite v9.16 (Sali and Blundell, 1993). A sequence alignment between TaHDZipI-3, TaHDZipI-5 and the template was performed with MUSCLE (Edgar, 2004) and visualised in Annotator (Gille *et al.*, 2014). The DNA *cis*-element HDZ1 (5'-CAATCATTGC-3'/5'-GCAATGATTG-3') was constructed from the AT-rich *cis*-element (5'-TAATTGAATT-3'/5'-AATTCAATTA-3') of 1JGG using Coot (Emsley *et al.*, 2010). Fifty models were generated using different random starting coordinates, and models with the lowest score of the Modeller Objective Function (MOF) (Shen and Sali, 2006) and Discrete Optimised Protein Energy (DOPE) (Eswar *et al.*, 2006) were selected. The final protein models were chosen based on conformational energy calculations with ProSa2003 (Sippl, 1993) that were validated by PROCHECK (Laskowski *et al.*, 1993). DOPE/MOF/z-score parameters for TaHDZipI-5/HDZ1 and TaHDZipI-3/TaHDZipI-5/HDZ1 were -9,716/898/-4.45 and -10,253/810/-6.30,

respectively. The construction of structural models of homo-dimeric TaHDZipI-3 HDs was described previously (Harris *et al.*, 2016). The stabilities of 3D models were calculated using FoldX (Schymkowitz *et al.*, 2005).

#### *Analysis of transgenic plants*

Three independent T<sub>1</sub> lines of transgenic wheat with a single copy of the transgene were selected for primary phenotypic characterisation and seed multiplication. Twelve seeds of control plants (WT) and twelve T<sub>1</sub> transgenic seeds from each line were sown into 12-cm square pots filled with coco-peat soil, with one plant per pot, and grown under well-watered conditions in a greenhouse with day/night temperatures of 23°C (16 hours) and 19°C (8 hours). Leaves of three-week old control and transgenic seedlings of each line were sampled for genomic DNA isolation. Plant height, tiller and spike number, seed weight, total dry biomass, seed number, flowering time and single grain weight were recorded for each plant. The transgene copy number was determined by Q-PCR (Fig. S1).

Comparative evaluations of growth and yield components of transgenic T<sub>3</sub> lines and control plants grown under well-watered and mild-drought conditions were performed in two large containers filled with a mixture of coco-peat, sand and clay soil (1:1:1) (Shavrukov *et al.*, 2016). Three independent T<sub>3</sub> lines of all four transgenics were used for the evaluation of growth and yield components. Untransformed WT plants were used as control. Transgenic plants were grown in two identical containers, one with well-watered conditions and one with slowly increasing drought. In each container, 16 plants of each transgenic line and the same number of WT plants were randomly grown in rows, with eight plants per row. Leaf samples of each plant were collected for DNA/RNA isolation at the three-leaf stage of seedling development. In the well-watered container, plants were regularly watered until maturity. In the drought-

subjected container, plants were regularly watered until mid-tillering and watering stopped thereafter. Plants showed signs of mild wilting at the beginning of flowering. The soil water potential of each container was automatically monitored and recorded by Magpie-3 (Measuring Engineering Australia) using sensors in two depths (10 cm and 30 cm) below the soil surface (Fig. S1). Growth and yield characteristics of transgenic lines and control plants were monitored in both containers. The data for each measured parameter for each line were statistically analysed using Student *t*-tests (unpaired, two-tails), and null-segregants were excluded from the analyses in cases where lines were heterozygous.

#### *Drought tolerance test or the survival rate of seedlings under terminal drought*

Two independent homozygous lines with minimal differences in a seedling size to those of control plants were used in a drought survival test, conducted in a PC2 glasshouse. WT plants were used as control. Seeds were sown in five 6-inch round pots filled with the same amount of coco-peat soil. Before sowing seeds, the soil in each pot was water-saturated by soaking the pot in water overnight in plastic trays. The following day, pots were removed and drained for 24 hours, and each pot was weighed after drainage. The soil moisture weight was calculated as the difference between the soil weight after drainage and the dry soil weight (measured after incubation for a week at 65°C). Two plants of each line and WT plants were grown in each pot in the growth room under 24°C during 16 hours day light and 19°C during 8 hours darkness. Plants in each pot were well-watered for three weeks, after which watering was stopped. During the well-watered stage, each pot was weighted daily and water was added if the soil water content was below 80% of soil moisture weight. After 25 to 28 days of drought, plants were re-watered and survival rates were assessed after a three-week recovery.

#### *Frost tolerance test (survival rate of seedlings subjected to frost)*

Three T<sub>3</sub> independent homozygous lines of transgenic plants were used in a frost survival test. Untransformed WT plants were used as control. Seeds were sown in twelve 6-inch round pots filled with coco-peat soil. One plant of each line and WT plants were grown in a pot (Fig. S2A). Plants in each pot were well-watered and kept in a PC2 room (24/16 °C of day/night temperature, 16 hours day length) for three weeks and later placed into a cold cabinet (BINDER, Tuttlingen, Germany). Plants in the cold cabinet were exposed to temperatures decreasing gradually from 18 °C to a minimum temperature of -8 °C with 6.5 hours under the lowest temperature, and then slowly returned back to 18 °C (Fig. S2B). Pots were insulated to protect plant roots from frost-damage. Leaf tissues for RNA isolation were collected before the stress application (Fig. S2B). In addition, leaves of plants with stress-inducible promoters and control plants were collected at 4 °C. The ice nucleating agent SNOMAX<sup>®</sup> (Sno-Quip Pty Ltd, Mittagong, NSW, Australia) (2 g/L) was used to spray plants to prevent water crystallisation below 0 °C. After the frost treatment, pots were transferred back to the PC2 growth room for recovery. Survival rates were estimated after two weeks of recovery.

*Analysis of expression of potential downstream genes in transgenic lines with constitutive overexpression of TaHDZipI-5*

The analysis of the downstream gene expression was performed by Q-PCR, as described by Fletcher *et al.* (2014). Gene-specific primers from 3'UTRs (Table S1) were used to analyse the expression levels of *TaWZY2* (GenBank: EU395844), *TaCOR14B* (GenBank: AF207546; Tsvetanov *et al.*, 2000), *TaRAB15* (GenBank: X59133; King *et al.*, 1992) and *TaDREB3* (GenBank: DQ353853; Lopato *et al.*, 2006) genes in three independent control WT plants and three T<sub>3</sub> sublines of each of three independent transgenic lines with the constitutive overexpression of *TaHDZipI-5*. Three technical replicates were used in this experiment.

## Legends to supplementary figures

**Fig. S1.** Soil water tension monitored at 10 cm and 30 cm depths in large containers used for plant growth under well-watered conditions or increasing drought. An arrow (no watering) indicates the point at which watering was withdrawn.

**Fig. S2.** Details of frost tolerance experiments. (a) Position of seedlings in pots during frost tolerance tests. (b) Temperature and light conditions during frost tolerance experiments in a semiautomatic cold cabinet.

**Fig. S3.** Alignments of *TdHDZipI-5A* and *TdHDZipI-5B* promoter sequences and sequences of corresponding genes of *Triticum aestivum* cv. Chinese Spring, identified in the Whole Genome Reference Assembly Pseudomolecules v1.0 databases of the International Wheat Genome Sequencing Consortium, using the BLAST software (Altschul *et al.*, 1997).

**Fig. S4.** Alignment of *TdHDZipI-5B* (5B) and *TdHDZipI-5A* (5A) promoters. LALIGN (Huang and Miller, 1991) was used to find the best local alignments. Primers used for generation of promoter deletions are underlined. Characteristic elements present in sequences of both promoters are indicated with boxes of different colours. MYBR - MYB recognition element; ABRE - abscisic acid responsive element; ATG - translational start.

**Fig. S5.** (a) Transgene copy numbers in T<sub>1</sub> transgenic plants estimated by Q-PCR. Plants seeds used in analyses are indicated by arrows. (b) Examples of selection of homozygous lines by PCR using transgene-specific primers. Homozygous T<sub>1</sub> sublines of two independent single-transformation-event lines were selected using the analysis of the transgene (*TaHDZipI-5*) presence in the T<sub>2</sub> progeny. H<sub>2</sub>O - sample containing no DNA, WT - sample containing DNA



isolated from WT untransformed plant, P - positive control, where 1000-fold diluted plasmid DNA was used as a template.

**Fig. S6.** Growth characteristics and yield components of control wild-type (WT) and transgenic T<sub>1</sub> wheat (*Triticum aestivum* cv. Gladius) plants transformed with pUbi-TaHDZipI-5. Plants were grown under well-watered conditions. Flowering time of transgenic plants was compared with the average flowering time of 12 control WT plants, which is represented as day 0. Differences between transgenic lines and WT plants were tested in the unpaired Student's t-test (\* P<0.05, \*\* P<0.01, \*\*\* for P < 0.001).

**Fig. S7.** Expression levels of three stress-inducible LEA (Late Embryogenesis Abundant)/COR (Cold-Responsive)/DHN (Dehydrin) genes (*TaWZY2*, GenBank: EU395844; *TaCOR14B*, GenBank: AF207546; *TaRab15*, GenBank: X59133) and the TaDREB3 (GenBank: DQ353853) regulatory gene, in leaves of unstressed control WT plants and T<sub>3</sub> sublines of tree independent transgenic lines. Expression levels of the *TaHDZipI-5* transgene in the same lines are shown in Fig. 6D. No correlation was found between the expression levels of the *TaHDZipI-5* transgene and downstream genes. Error bars represent  $\pm$  SD of three technical replicates.

### Legends to supplementary tables

**Table S1.** List of PCR primers and DNA probes used in this study.

**Table S2.** A sequence alignment of 14 entries (with GenBank accession numbers) used to generate a phylogenetic tree displaying the evolutionary relationships of HD-Zip I  $\gamma$ -clade TFs from *Arabidopsis* and selected monocots, shown in Fig. 1. Asterisks (\*) indicate positions with a single conserved residue; colons (:) indicate conservation between residues with strongly

similar properties (scoring > 0.5 in the Gonnet PAM 250 matrix); full stops (.) indicate conservation between residues with weakly similar properties (scoring ≤ 0.5 in the Gonnet PAM 250 matrix).

**Table S3.** Hydrogen bonds of homo-dimeric TaHDZipI-3 and TaHDZipI-5, and hetero-dimeric TaHDZipI-3/TaHDZipI-5 with HDZ1 (5'-CAATCATTGC-3'/5'-GCAATGATTG-3').

**Table S4.** Characteristics of the T<sub>2</sub>/T<sub>3</sub> progenies of *TaHDZipI-5* transgenic lines analysed in large containers under well-watered or mild drought condition.

### Supplementary references

Agalou, A., Purwantomo, S., Overnas, E., Johannesson, H., Zhu, X., Estiati, A., Kam, R.J.D. *et al.* (2008) A genome-wide survey of HD-Zip genes in rice and analysis of drought-responsive family members. *Plant Mol. Biol.* **66**, 87–103.

Altschul, S. F., Madden, T. L., Schaeffer, A. A., Zhang, J., Zhang, Z., Miller, W. and Lipman D. J. (1997) Gapped BLAST and PSI-BLAST: a new generation of protein database search programs. *Nucleic Acids Res.* **25**, 3389–3402.

Cenci, A., Chantret, N., Kong, X., Gu, Y., Anderson, O.D., Fahima, T., Distelfeld, A. *et al.* (2003). Construction and characterization of a half million clone BAC library of durum wheat (*Triticum turgidum* ssp *durum*). *Theor. Applied Genet.* **107**, 931–939.

Curtis, M.D. and Grossniklaus, U. (2003) A gateway cloning vector set for high-throughput functional analysis of genes in planta. *Plant Physiol.* **133**, 462–469.

Edgar, R.C. (2004) MUSCLE: multiple sequence alignment with high accuracy and high throughput. *Nucleic Acids Res.* **32**: 1792–1797.

- Eini, O., Yang, N., Pyvovarenko, T., Pillman, K., Bazanova, N., Tikhomirov, N., Eliby, S. *et al.* (2013) Complex regulation by Apetala2 domain-containing transcription factors revealed through analysis of the stress-responsive *TdCor410b* promoter from durum wheat. *PloS One* **8**, e58713.
- Emsley, P., Lohkamp, B., Scott, W.G. and Cowtan, K. (2010) Features and development of Coot. *Acta Crystallogr.* **66**, 486–501.
- Eswar, N., Webb, B., Marti-Renom, M.A., Madhusudhan, M.S., Eramian, D., Shen, M.-Y., Pieper, U. *et al.* (2006) Comparative protein structure modeling using Modeller. *Curr. Protoc. Bioinform.*: John Wiley & Sons, Inc.
- Ferdous, J., Li, Y., Reid, N., Langridge, P., Shi, B.J. and Tricker, P.J. (2015) Identification of reference genes for quantitative expression analysis of microRNAs and mRNAs in barley under various stress conditions. *PloS One* **10**, e0118503.
- Fletcher, S.J. (2014) qPCR for quantification of transgene expression and determination of transgene copy number. *Meth. Mol. Biol.* **1145**, 213–237.
- Gille, C., Föhling, M., Weyand, B., Wieland, T. and Gille, A. (2014) Alignment-annotator web server: rendering and annotating sequence alignments. *Nucleic Acids Res.* **42**, W3-W6.
- Harris, J.C., Sornaraj, P., Taylor, M., Bazanova, N., Baumann, U., Lovell, B., Langridge, P. *et al.* (2016) Molecular interactions of the  $\gamma$ -clade homeodomain-leucine zipper class I transcription factors during the wheat response to water deficit. *Plant Mol. Biol.* **90**, 435–452.
- Henriksson, E., Olsson, A.S., Johannesson, H., Johansson, H., Hanson, J., Engström, P. and Söderman, E. (2005) Homeodomain leucine zipper class I genes in *Arabidopsis*. Expression patterns and phylogenetic relationships. *Plant Physiol.* **139**, 509–518.
- Higo, K., Ugawa, Y., Iwamoto, M. and Korenaga, T. (1999) Plant *cis*-acting regulatory DNA elements (PLACE) database: 1999. *Nucleic Acids Res.* **27**, 297–300.

- Hirsch, J.A. and Aggarwal, A.K. (1995) Structure of the even-skipped homeodomain complexed to AT-rich DNA: new perspectives on homeodomain specificity. *EMBO J.* **14**, 6280-6291.
- Hu, R., Chi, X., Chai, G., Kong, Y., He, G., Wang, X., Shi, D. *et al.* (2012) Genome-wide identification, evolutionary expansion, and expression profile of homeodomain-leucine zipper gene family in poplar (*Populus trichocarpa*). *PloS One* **7**, e31149.
- Huang, X. and Miller, W. (1991) A time-efficient, linear-space local similarity algorithm. *Adv. Appl. Math.* **12**, 337–357.
- Jin, J., Tian, F., Yang, D.C., Meng, Y.Q., Kong, L., Luo, J. and Gao, G. (2017) PlantTFDB 4.0: toward a central hub for transcription factors and regulatory interactions in plants. *Nucleic Acids Res.* **45**, D1040–D1045.
- Katoh, K. and Standley, D.M. (2013) MAFFT multiple sequence alignment software version 7: improvements in performance and usability. *Mol. Biol. Evol.* **30**, 772–780.
- King, S.W., Joshi, C. and Nguyen, H.T. (1992) DNA sequence of an ABA-responsive gene (*rab15*) from water-stressed wheat roots. *Plant Mol. Biol.* **18**, 119–121.
- Laskowski, R.A., MacArthur, M.W., Moss, D.S. and Thornton, J.M. (1993) PROCHECK: a program to check the stereochemical quality of protein structures. *J. Appl. Crystallogr.* **26**, 283–291.
- Lopato, S., Bazanova, N., Morran, S., Milligan, A.S., Shirley, N. and Langridge, P. (2006) Isolation of plant transcription factors using a modified yeast one-hybrid system. *Plant Meth.* **2**, 3–17.
- Sali, A. and Blundell, T. (1993) Comparative protein modeling by satisfaction of spatial restraints. *J. Mol. Biol.* **234**, 779–815.

- Schymkowitz, J.W., Rousseau, F., Martins, I.C., Ferkinghoff-Borg, J., Stricher, F. and Serrano, L. (2005) Prediction of water and metal binding sites and their affinities by using the Fold-X force field. *Proc. Natl. Acad. Sci. USA* **102**, 10147–10152.
- Shavrukov, Y., Baho, M., Lopato, S. and Langridge, P. (2016) The *TaDREB3* transgene transferred by conventional crossings to different genetic backgrounds of bread wheat improves drought tolerance. *Plant Biotechnol. J.* **14**, 313–322.
- Shen, M., Sali, A. (2006) Statistical potential for assessment and prediction of protein structures. *Prot. Sci.* **15**, 2507–2524.
- Sippl, M.J. (1993) Recognition of errors in three-dimensional structures of proteins. *Proteins: Struct. Funct. Bioinf.* **17**, 355–362.
- Tamura, K., Stecher, G., Peterson, D., Filipinski, A. and Kumar, S. (2013) MEGA6: molecular evolutionary genetics analysis version 6.0. *Mol. Biol. Evol.* **30**, 2725–2729.
- Tsvetanov, S., Ohno, R., Tsuda, K., Takumi, S., Mori, N., Atanassov, A. and Nakamura, C. (2000) A cold-responsive wheat (*Triticum aestivum* L.) gene *wcor14* identified in a winter-hardy cultivar Mironovska 808. *Genes Genet. Syst.* **75**, 49–57.
- Zhao, Y., Zhou, Y., Jiang, H., Li, X., Gan, D., Peng, X., Zhu, S. *et al.* (2011) Systematic analysis of sequences and expression patterns of drought-responsive members of the *HD-Zip* gene family in maize. *PloS One* **6**, e28488.

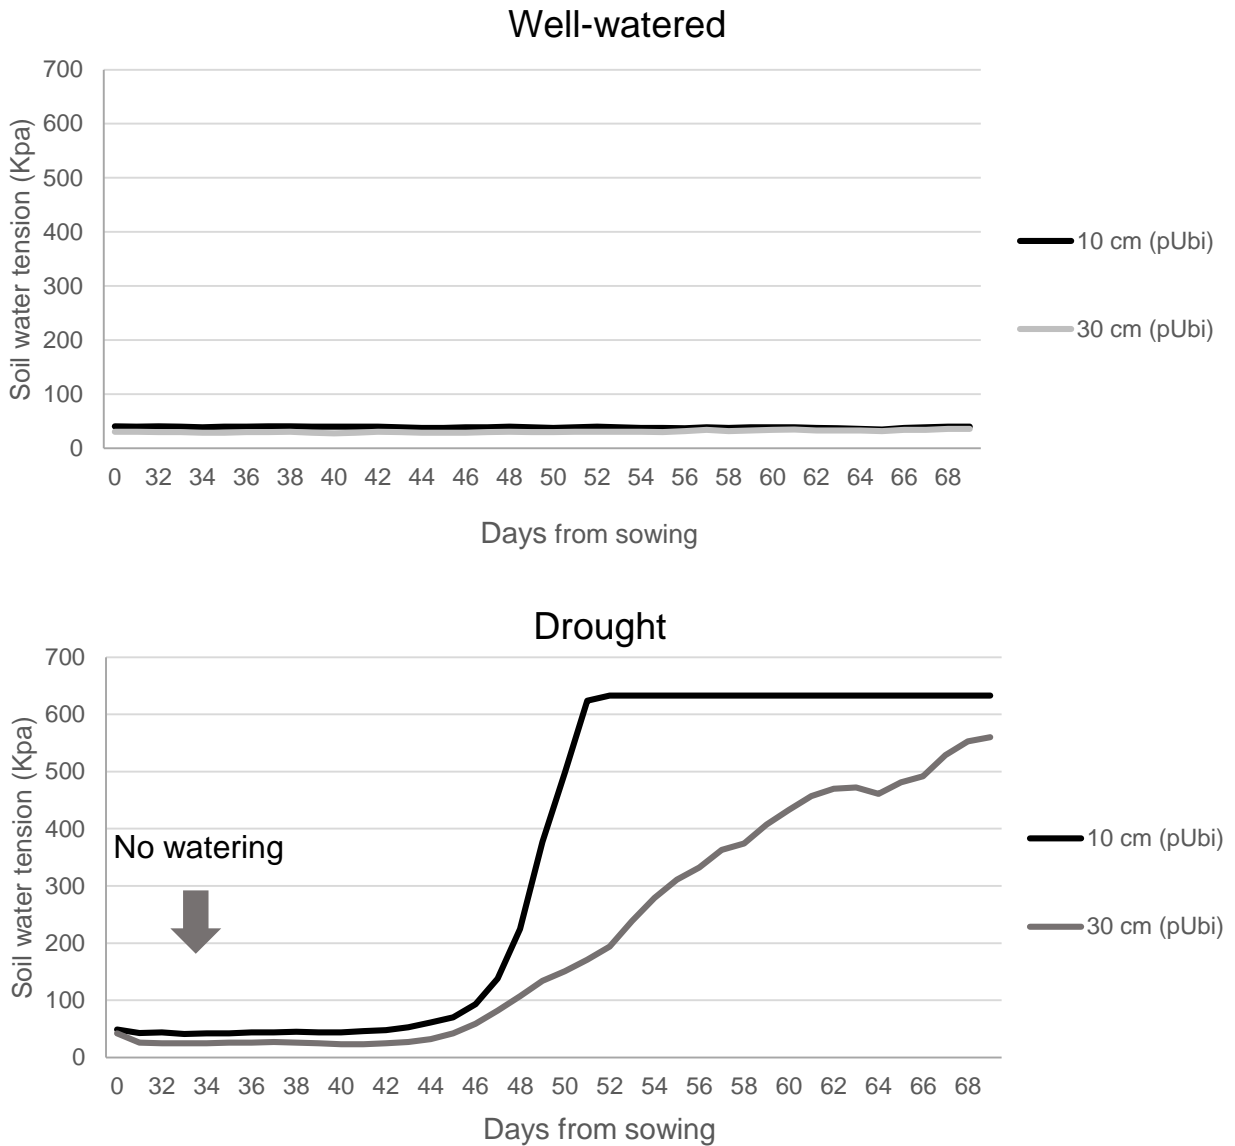

**Fig. S1.** Soil water tension monitored at 10 cm and 30 cm depths in large containers used for plant growth under well-watered conditions or increasing drought. An arrow (no watering) indicates the point at which watering was withdrawn.

(a)

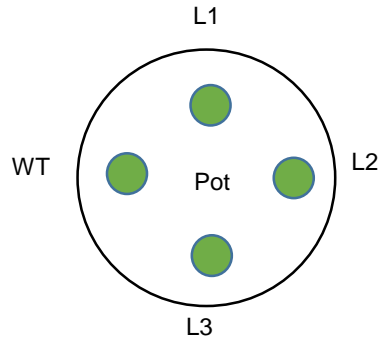

(b)

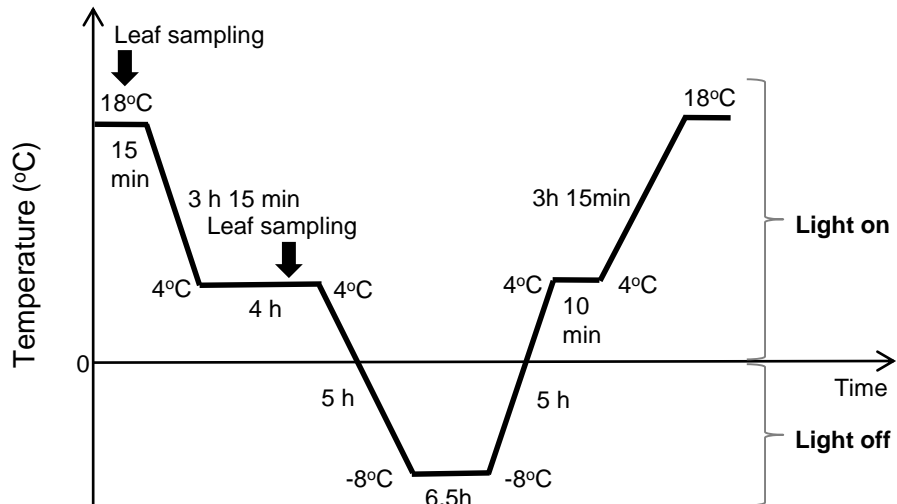

**Fig. S2.** Details of frost tolerance experiments. (a) Position of seedlings in pots during frost tolerance tests. (b) Temperature and light conditions during frost tolerance experiments in a semi-automated cold cabinet.

Query= TdHDZipI-5A (promoter + 5'UTR sequence) (2354 letters)  
Sequences producing significant alignments: chr2B (Sbjct)  
Score = 2409 bits (1215), Expect = 0.0  
Identities = 1218/1219 (99%)  
Strand = Plus / Plus

```
Query: 1136      gtatcgtgctactgcggtcgaatgacctgaccccccggtaccgaagtcggaagaac 1195
                |||
Sbjct: 578603883 gtatcgtgctactgcggtcgaatgacctgaccccccggtaccgaagtcggaagaac 578603942

Query: 1196      tccaccagcgactagcattcaacaaataaaggcagttcagtcgcaccgggtcaccgctt 1255
                |||
Sbjct: 578603943 tccaccagcgactagcattcaacaaataaaggcagttcagtcgcaccgggtcaccgctt 578604002

Query: 1256      ttaacttacctgatctgctctagcacgtttgatcgtgggaggtcgggggcagcgaatcg 1315
                |||
Sbjct: 578604003 ttaacttacctgatctgctctagcacgtttgatcgtgggaggtcgggggcagcgaatcg 578604062

Query: 1316      ccggcctccgggtgaaaacgatcgatcgaggataacctctgctccccgactgacaccc 1375
                |||
Sbjct: 578604063 ccggcctccgggtgaaaacgatcgatcgaggataacctctgctccccgactgacaccc 578604122

Query: 1376      ccaagtgcctatcacgttcaactcaccgtatctatctatcctgagttaccatgatg 1435
                |||
Sbjct: 578604123 ccaagtgcctatcacgttcaactcaccgtatctatctatcctgagttaccatgatg 578604182

Query: 1436      tctcttctggtaaacgatcgatggagtaaactagtggagcgcaccaggacaacaggcga 1495
                |||
Sbjct: 578604183 tctcttctggtaaacgatcgatggagtaaactagtggagcgcaccaggacaacaggcga 578604242

Query: 1496      caagaccggccaacgcgcggcgacgcgctagctatagtgtgctctgtgcatcggcc 1555
                |||
Sbjct: 578604243 caagaccggccaacgcgcggcgacgcgctagctatagtgtgctctgtgcatcggcc 578604302

Query: 1556      cggtcgttgagcccgggaacgggacaaacgcggcgccacctcgacgccccttccggc 1615
                |||
Sbjct: 578604303 cggtcgttgagcccgggaacgggacaaacgcggcgccacctcgacgccccttccggc 578604362

Query: 1616      ggaagccccgcacacctggcgccgcgacggcgacgctgcagccccgcagggagctagg 1675
                |||
Sbjct: 578604363 ggaagccccgcacacctggcgccgcgacggcgacgctgcagccccgcagggagctagg 578604422

Query: 1676      ccctctggcgcgacggccattggtcctacctgttctcctcggcccgtccccgtctcc 1735
                |||
Sbjct: 578604423 ccctctggcgcgacggccattggtcctacctgttctcctcggcccgtccccgtctcc 578604482

Query: 1736      ccgtggaacaccaaggcgacacctttccaccaccattggccggcaagccccatgatac 1795
                |||
Sbjct: 578604483 ccgtggaacaccaaggcgacacctttccaccaccattggccggcaagccccatgatac 578604542

Query: 1796      actactaggactgggtactgctgatcctttctcgtgcagctgatcgatcgattcgtag 1855
                |||
Sbjct: 578604543 actactaggactgggtactgctgatcctttctcgtgcagctgatcgatcgattcgtag 578604602

Query: 1856      aatcgtagtacatgaaaatgagagaagtgacagacagagaagaaaataaacgaaaagaa 1915
                |||
Sbjct: 578604603 aatcgtagtacatgaaaatgagagaagtgacagacagagaagaaaataaacgaaaagaa 578604662

Query: 1916      cacgtccggctgacttaatttgcaattcgtaggccggaaggaagacttgaatgagcagga 1975
                |||
Sbjct: 578604663 cacgtccggctgacttaatttgcaattcgtaggccggaaggaagacttgaatgagcagga 578604722

Query: 1976      ggaggaggagaagcaagatctttgcaactcgtggccacgtttcgggtgcccgatctcgaggc 2035
                |||
Sbjct: 578604723 ggaggaggagaagcaagatctttgcaactcgtggccacgtttcgggtgcccgatctcgaggc 578604782

Query: 2036      tggaggatagacatgggggcccgtggtgggcacagcttctggcgccgctggatgcgcgca 2095
                |||
Sbjct: 578604783 tggaggatagacatgggggcccgtggtgggcacagcttctggcgccgctggatgcgcgca 578604842

Query: 2096      cacttggcctggcggacgaaagcggcctttgcgcggtgtcaggctgctgggtcccgcccg 2155
                |||
Sbjct: 578604843 cacttggcctggcggacgaaagcggcctttgcgcggtgtcaggctgctgggtcccgcccg 578604902

Query: 2156      ggaggtttctttatccgccatcgcaagaccacatgttcgcacatctcgcgcaacgggaca 2215
                |||
Sbjct: 578604903 ggaggtttctttatccgccatcgcaagaccacatgttcgcacatctcgcgcaacgggaca 578604962
```





```

Query: 1503      agatgaaaatgcaagaggttccgtggcgtggacagacagacataggtagagagaaataa 1562
                |||
Sbjct: 637983967 agatgaaaatgcaagaggttccgtggcgtggacagacagacataggtagagagaaataa 637984026

Query: 1563      cgaacgaaaattactcgtccgtagaggcttgcaattcgttagccggaaggaagccttga 1622
                |||
Sbjct: 637984027 cgaatgaaaattactcgtccgtagaggcttgcaattcgttagccggaaggaagccttga 637984086

Query: 1623      gtgagcgaagaggaggaggagaagcaagatctttgcacccgtggccacgtttcgggtg 1682
                |||
Sbjct: 637984087 gtgagcgaagaggaggaggagtagaagcaagatctttgcacccgtggccacgtttcgggtg 637984146

Query: 1683      ccgatctcgaggcgggaggatagacatggggcgccgtggtggcgcgagcctctggcgcc 1742
                |||
Sbjct: 637984147 ccgatctcgaggcgggaggatagacatggggcgccgtggtggcgcgagcctctggcgcc 637984206

Query: 1743      gctggatccgacacttggccggggcggaagcggtttcgcgcggtgtcaggccgc 1802
                |||
Sbjct: 637984207 gctggatccgacacttggccggggcggaagcggtttcgcgcggtgtcaggccgc 637984266

Query: 1803      gtgggcccggaggggaggtttctttatccgccgtcggaagaccacatgttcggtctc 1862
                |||
Sbjct: 637984267 gtgggcccggaggggaggtttctttatccgccgtcggaagaccacatgttcggtctc 637984326

Query: 1863      gcgcagcgcggacacgtaacgccgcccgggtataaaacgggcctcccggcgcgagag 1922
                |||
Sbjct: 637984327 gcgcagcgcggacacgtaacgccgcccgggtataaaacgggcctcccggcgcgagag 637984386

Query: 1923      acagaggaaggaggaaggacggacggcatagcgtagggaggggatccatccagcagagc 1982
                |||
Sbjct: 637984387 acagaggaaggaggaaggacggacggcatagcgtagggaggggatccatccagcagagc 637984446

Query: 1983      agaggagagcagcgaccgggtcggagcagagcagtgggcgccactgggtcggtcggc 2039
                |||
Sbjct: 637984447 agaggagagcagcgaccgggtcggagcagagcagtgggcgccactgggtcggtcggc 637984503

```

**Fig. S3.** Alignments of *TdHDZipI-5A* and *TdHDZipI-5B* promoter sequences and sequences of corresponding genes of *Triticum aestivum* cv. Chinese Spring, identified in the Whole Genome Reference Assembly Pseudomolecules v1.0 databases of the International Wheat Genome Sequencing Consortium, using the BLAST software (Altschul *et al.*, 1997).



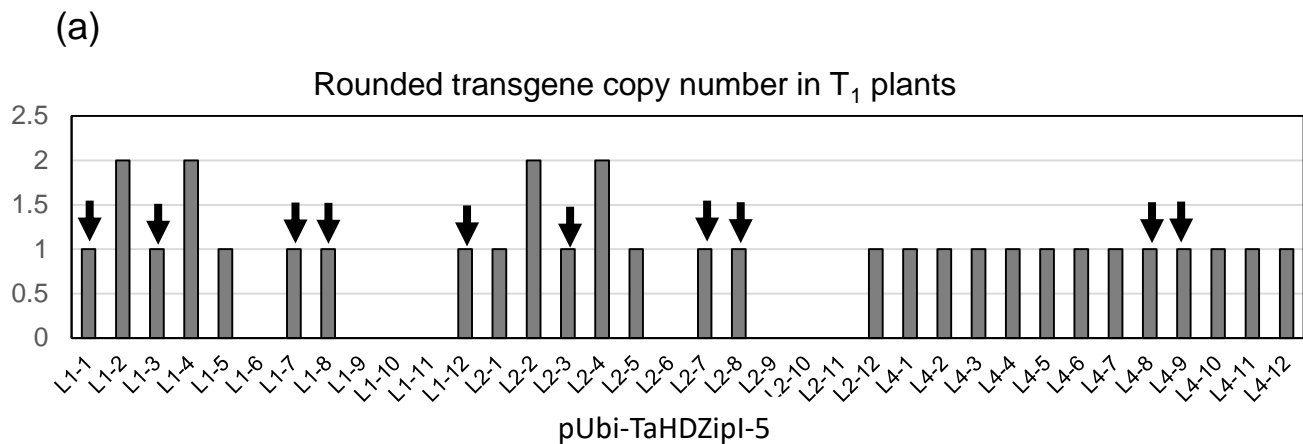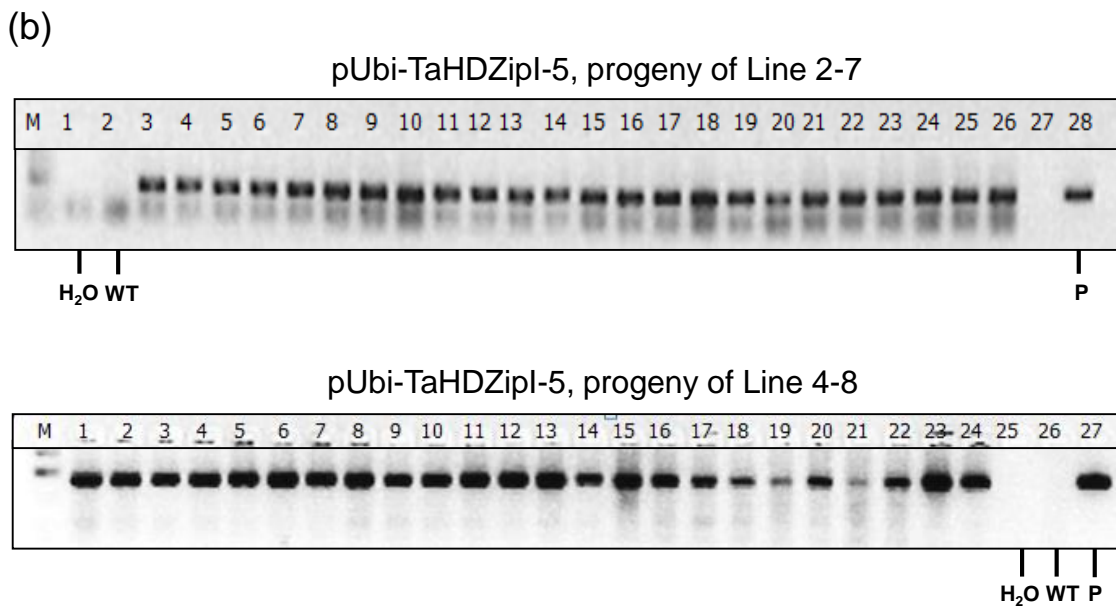

**Fig. S5.** (a) Transgene copy numbers in  $T_1$  transgenic plants estimated by Q-PCR. Plants seeds used in analyses are indicated by arrows. (b) Examples of selection of homozygous lines by PCR using transgene-specific primers. Homozygous  $T_1$  sublines of two independent single-transformation-event lines were selected using the analysis of the transgene (*TaHDZipl-5*) presence in the  $T_2$  progeny. H<sub>2</sub>O - sample containing no DNA, WT - sample containing DNA isolated from WT untransformed plant, P - positive control, where 1000-fold diluted plasmid DNA was used as a template.

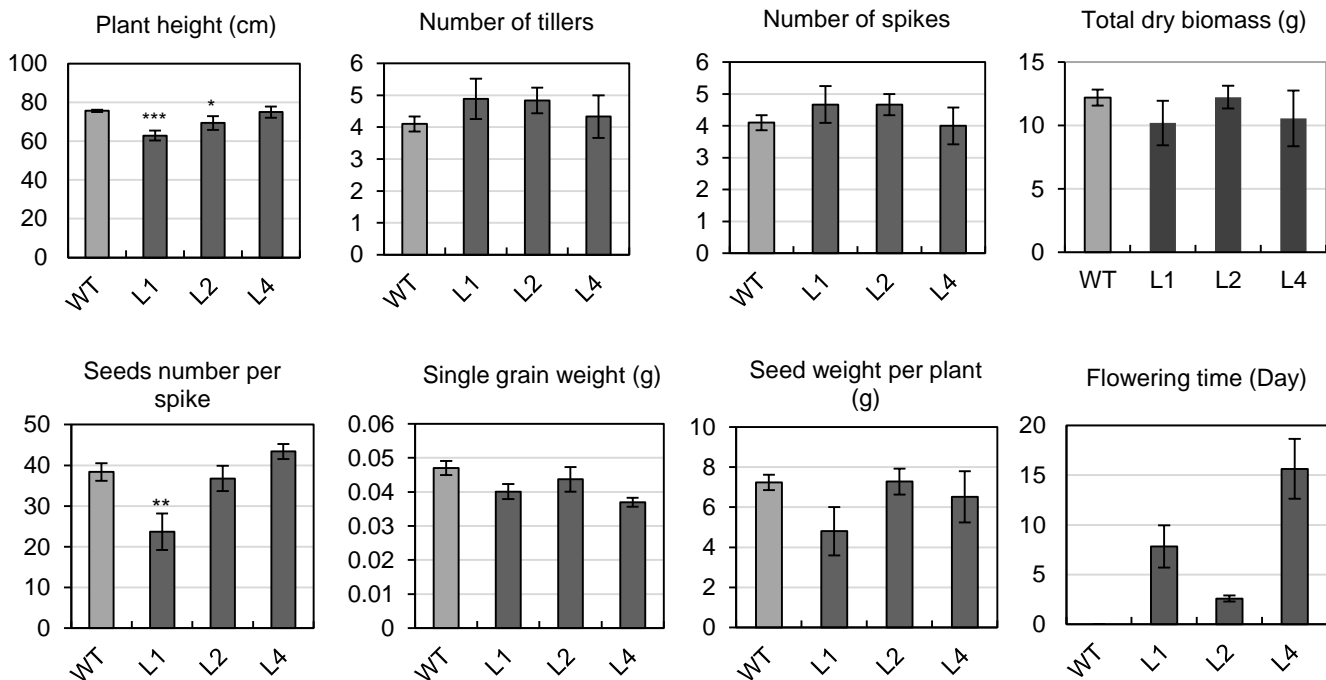

**Fig. S6.** Growth characteristics and yield components of control wild-type (WT) and transgenic T<sub>1</sub> wheat (*Triticum aestivum* cv. Gladius) plants transformed with pUbi-TaHDZipI-5. Plants were grown under well-watered conditions. Flowering time of transgenic plants was compared with the average flowering time of 12 control WT plants, which is represented as day 0. Differences between transgenic lines and WT plants were tested in the unpaired Student's t-test (\* P<0.05, \*\* P<0.01, \*\*\* for P < 0.001).

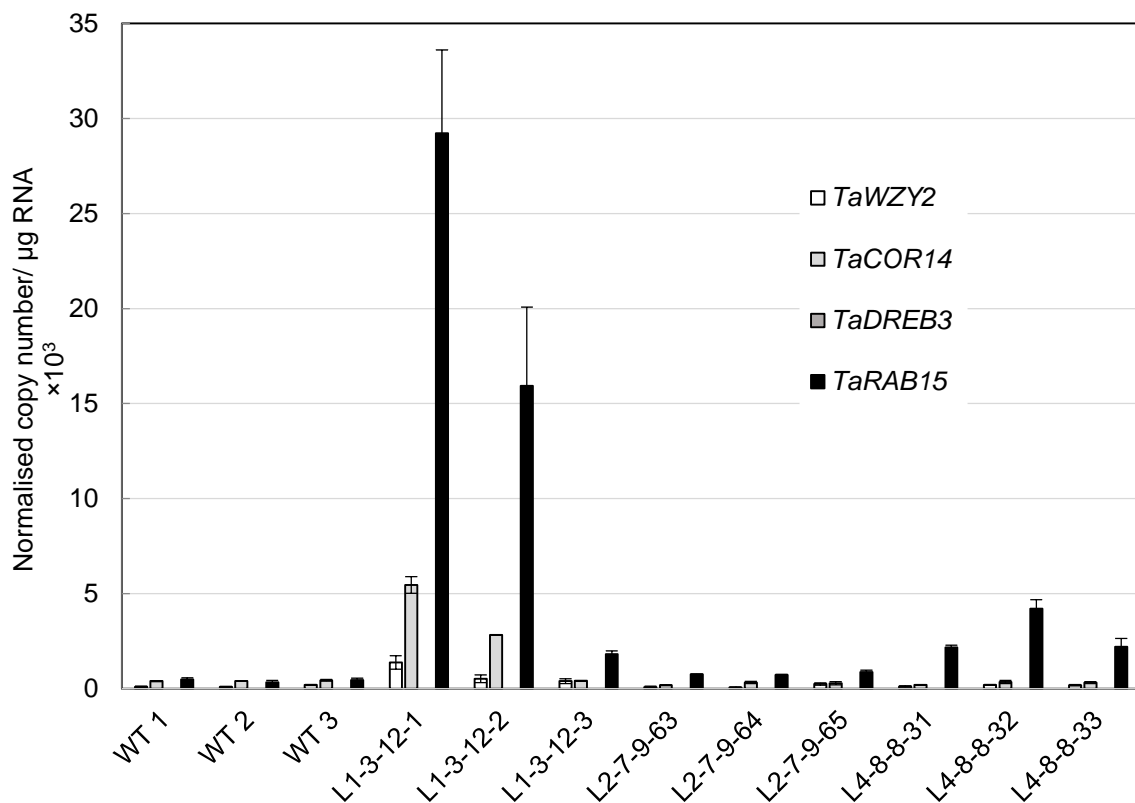

**Fig. S7.** Expression levels of three stress-inducible LEA (Late Embryogenesis Abundant)/COR (Cold-Responsive)/DHN (Dehydrin) genes (*TaWZY2*, GenBank: EU395844; *TaCOR14B*, GenBank: AF207546; *TaRab15*, GenBank: X59133) and the *TaDREB3* (GenBank: DQ353853) regulatory gene, in leaves of unstressed control WT plants and T<sub>3</sub> sublines of tree independent transgenic lines. Expression levels of the *TaHDZipI-5* transgene in the same lines are shown in Fig. 6D. No correlation was found between the expression levels of the *TaHDZipI-5* transgene and downstream genes. Error bars represent  $\pm$  SD of three technical replicates.

**Table S1.** List of PCR primers and DNA probes used in this study.

| Short name                       | Purpose                                       | Designation    | Nucleotide sequence (5'–3') |
|----------------------------------|-----------------------------------------------|----------------|-----------------------------|
| <i>TaHDZipI-5</i> ,<br>transgene | PCR, transgene specific primers               | Forward primer | GGTCTTCCCGGAGTCCTTCTGC      |
|                                  |                                               | Reverse primer | CATCGCAAGACCGGCAACAGG       |
| <i>Nos</i> terminator            | Q-PCR, copy number                            | Forward primer | CTTAAGATTGAATCCT            |
|                                  |                                               | Reverse primer | CGAATTCAGTAACATAGA          |
|                                  |                                               | TaqMan probe   | AGCGCGCAAACCTAGGAT          |
| <i>Pin-b</i>                     | Q-PCR, copy number                            | Forward primer | ATTTTCCAGTCACCTGGCCC        |
|                                  |                                               | Reverse primer | TGCTATCTGGCTCAGCTGC         |
|                                  |                                               | TaqMan probe   | ATGGTGGAAAGGGCGGCTGTGA      |
| <i>TaCRT</i>                     | RT-qPCR                                       | Forward primer | CGATGATGATGATGGCATATGG      |
|                                  |                                               | Reverse primer | TACCTGCCAAACTTCAATTCC       |
| <i>TaHDZipI-5</i> ,<br>endogene  | Q-PCR, gene expression                        | Forward primer | GAGAGCTGCGTGCTC             |
|                                  |                                               | Reverse primer | CGAACCACTTTGTACAAG          |
| <i>TaActin</i>                   | Q-PCR, gene expression                        | Forward primer | GACAATGGAACCGGAATGGTC       |
|                                  |                                               | Reverse primer | GTGTGATGCCAGATTTTCTCCAT     |
| <i>TaCyclophilin</i>             | Q-PCR, gene expression                        | Forward primer | CAAGCCGCTGCACTACAAGG        |
|                                  |                                               | Reverse primer | AGGGGACGGTGCAGATGAA         |
| <i>TaGAPdH</i>                   | Q-PCR, gene expression                        | Forward primer | TTCAACATCATTCCAAGCAGCA      |
|                                  |                                               | Reverse primer | CGTAACCCAAAATGCCCTTG        |
| <i>TaEFA</i>                     | Q-PCR, gene expression                        | Forward primer | CAGATTGGCAACGGCTACG         |
|                                  |                                               | Reverse primer | CGGACAGCAAAACGACCAAG        |
| <i>TaWZY2</i>                    | Q-PCR, gene expression                        | Forward primer | TACGGACAGCAAGGTCATACG       |
|                                  |                                               | Reverse primer | TTCTGCAGAGGTGTCCAGAC        |
| <i>TaCOR14</i>                   | Q-PCR, gene expression                        | Forward primer | TTCTGCAGAGGTGTCCAGAC        |
|                                  |                                               | Reverse primer | ACCAACGTTGTAGCTCTTATAC      |
| <i>TaDREB3</i>                   | Q-PCR, gene expression                        | Forward primer | CTCGATTGCTTGTCTCCTCAG       |
|                                  |                                               | Reverse primer | TCCTGATGACAAGCTGTAGTGTGC    |
| <i>TaRab15</i>                   | Q-PCR, gene expression                        | Forward primer | ACAGGGACTGGAGGAGCCTAC       |
|                                  |                                               | Reverse primer | TGGAAGTGGAAAGGCTTTGACC      |
| <i>TdHDZipI-5 D1</i>             | PCR, promoter deletion fragment amplification | Forward primer | CACCCTTGCTGATCTGCTC         |
|                                  |                                               | Reverse primer | GCCACTGCTCTGCTCCGAC         |
| <i>TdHDZipI-5 D2</i>             | PCR, promoter deletion fragment amplification | Forward primer | CACCCAAGATCTTTGCACCCGTG     |
|                                  |                                               | Reverse primer | GCCACTGCTCTGCTCCGAC         |
| <i>TdHDZipI-5 D3</i>             | PCR, promoter deletion fragment amplification | Forward primer | CACCGGTGCCGATCTCGAGG        |
|                                  |                                               | Reverse primer | GCCACTGCTCTGCTCCGAC         |
| <i>TdHDZipI-5 D4</i>             | PCR, promoter deletion fragment amplification | Forward primer | CACCGAAGACCACATGTTTCG       |
|                                  |                                               | Reverse primer | GCCACTGCTCTGCTCCGAC         |

**Table S2.** A sequence alignment of 14 entries (with GenBank accessions) used to generate a phylogenetic tree displaying the evolutionary relationships of HD-Zip I  $\gamma$ -clade TFs from *Arabidopsis* and selected monocots, shown in Fig. 1. An asterisk (\*) indicates positions with a single conserved residue; a colon (:) indicates conservation between groups of strongly similar properties (scoring > 0.5 in the Gonnet PAM 250 matrix); a full stop (.) indicates conservation between groups of weakly similar properties (scoring  $\leq$  0.5 in the Gonnet PAM 250 matrix).

```

AtHB7_AY091364 -----MTEGGEY-----SPAMMSAE
AtHB12_AY087187 -----MEEGDFE-----NCCFSEIS
Zmhdz4_KJ728250 -----MDRPDH---QQQQFFMPTTVQV---PQPQQQQ-QQLCVPM-
Oshox22_AY224440 HASDGRITQLASWARIAMDRGDHHLQQQHQLMPPPPAPV---VP-----PQLCMPAM
TaHdZipI-5_KT224376 -----MDY-----HQQQQLMPPPPASL-----P----AQ-QQLCAPMM
Zmhdz6_EU972354 -----MERG-----DCQFTVVPPRQY-----DE-AQFMHQLM
Sb04g033380_XP_002452838 -----MERGD-----DCQFMVV--HQY-----DEAAQLMHQLM
Oshox24_AK063685 -----MES-----DCQFLVAPPQPHMYD'TAAA'AVDE-AQFLRQMV
TaHdZipI-4_KT224375 -----MES-----DRQFL'LAPP'PPM-----HAAPGDD-GQFLQQQQ
Zmhdz9_BT087258 -----MEG-D-----DDGPEWMMEV-
Sb02g030660_XP_002462710 -----MDG-E-----DDVPEWMMEV-
Zmhdz12_NM_001156038 -----MDGAE-----DDGTEWMMH--
Oshox6_AK103160 -----MDG-E-----ED-SEWMMMDV
TaHdZipI-3_KT224374 -----MEQGE-----ED-GDWMMEP-

```

\*

```

AtHB7_AY091364 PFLTM-----KK--MKKSNHN--KNNQRRFSDEQIKSLEMMF-ESE
AtHB12_AY087187 SGM'TMN-----KKK--MKKS-----NNQKRFSEEQIKSLELIF-ESE
Zmhdz4_KJ728250 -----LDEPPSSF-----LAG--RGGGGASGRGERKRRFTEEQIRSLESFHAHH
Oshox22_AY224440 --MADEQYMDL-----GGGGAAA--APGRGGA--GERKRRFTEEQIRSLESFHAHH
TaHdZipI-5_KT224376 --GMGMEMGEMEMEEQLC-----FVG--RGGGGRG--AERKRRFTEEQ'RSLESFHAHH
Zmhdz6_EU972354 --AAGDQ-----QDP--A-----GAG--RGAAGGG--GERKRRFTEEQ'RSLETTFHARR
Sb04g033380_XP_002452838 VAAAGDQ-----QDPNAG-----AAG--RGAGGGG--GERKRRFTEEQ'RSLETTFHARR
Oshox24_AK063685 --AAADH-----HAAAAGRGGGDGDG--GGGGGGG--GERKRRFTEEQ'RSLETTFHARR
TaHdZipI-4_KT224375 --LS-----GGGA--GERKRRFTEEQ'RSLESTFHTRR
Zmhdz9_BT087258 -----GGAGATG--KGKGGAL--DKNKKRFSEEQIKSLESF-ATQ
Sb02g030660_XP_002462710 -----GGAGGKGGKGGGGAL--DKNKKRFSEEQIKSLESF-ATQ
Zmhdz12_NM_001156038 -----GAGGKG--KGGGAL--DKNKKRFSEEQ'KSLESF-ATQ
Oshox6_AK103160 -----GGKGGKG--GGGGGA--ADRRKRFSEEQIKSLESF-ATQ
TaHdZipI-3_KT224374 -----AAG--KKGAM--IDRRKRFSEEQIKSLESF-ATQ

```

...:\*\*\*:\*\*\* :\*\*\* \*

```

AtHB7_AY091364 TRLEPRKKVQLARELGLQPRQVAIW'FQNKRARWKSQLETEYNILRQNYDNLASQFESLK
AtHB12_AY087187 TRLEPRKKVQVARELGLQPRQVAIW'FQNKRARWKTQLEKEYNTLRANYNLASQFEIMK
Zmhdz4_KJ728250 AKLEPREKAELARELGLQPRQVAIW'FQNKRARWR'SKQLEHDYALLRAKFDLLHAHVESLK
Oshox22_AY224440 AKLEPREKAELARELGLQPRQVAIW'FQNKRARWR'SKQLEHDYAALRSKYDALHSRVESLK
TaHdZipI-5_KT224376 AKLEPREKAELARELGLQPRQVAIW'FQNKRARWR'SKQLEHDF'TALRADYDALHSRVESLK
Zmhdz6_EU972354 AKLEPREKAELARELGLQPRQVAIW'FQNKRARWR'SKQLEHDYAALRAQFDAMHARVESLR
Sb04g033380_XP_002452838 AKLEPREKAELARELGLQPRQVAIW'FQNKRARWR'SKQLEHDYAALRARYDALHARVDSL
Oshox24_AK063685 AKLEPREKAELARELGLQPRQVAIW'FQNKRARWR'SKQIEHDYAALRAQYDALHARVESLR
TaHdZipI-4_KT224375 AKLEPREKAELARELGLQPRQVAIW'FQNKRARWR'SKQLEQDFAELRGHYDALHARVESLK
Zmhdz9_BT087258 TKLEPRQKQLARELGLQPRQVAIW'FQNKRARWKSQLE'RDYDALR'DDYDALLCSYESLK
Sb02g030660_XP_002462710 TKLEPRQKQLARELGLQPRQVAIW'FQNKRARWKSQLE'REYSALR'DDYDALLCSYESLK
Zmhdz12_NM_001156038 AKLEPRQKQLARELGLQPRQVAIW'FQNKRARWKSQLE'REYSALR'DDYHALLCSYESLK
Oshox6_AK103160 TKLEPRQKQLARELGLQPRQVAIW'FQNKRARWKSQLE'REYSALR'DDYDALLCSYESLK
TaHdZipI-3_KT224374 TKLEPRQKQLARELGLQPRQVAIW'FQNKRARWKSQLE'RYAALR'DDYDALLSSYDQLK
:****:* :*****:****:* : * : : : :

```

```

AtHB7_AY091364 KEKQALVSELQRLKEAT---QKKTQEER-----QCSGD-----Q
AtHB12_AY087187 KEKQSLVSELQRLNEEM---QRPKEEKHH-----ECCGD-----Q
Zmhdz4_KJ728250 QDKLALT'TQLSELSERL---RE-RDDRA-----AAAGGGGR-----E
Oshox22_AY224440 QEKLALT'VQLHELREERL---RE-REER-----SGNGGAA-----T
TaHdZipI-5_KT224376 HEKLALAAQQLQELSERL---RE-RDG-----GGGGAA-----T
Zmhdz6_EU972354 QEKIALAAQVDELGRGL---NE-RQDQ-----
Sb04g033380_XP_002452838 EEKLALAKQVDELGRGLQSVSE-RQDQ-----
Oshox24_AK063685 QEKLALADQVDELGRKGL---NE-RQDQ-----
TaHdZipI-4_KT224375 QEKLT'LAAQLEELK'KKL---NE-RQDQ-----
Zmhdz9_BT087258 KEKHTLLKQLEKLAEML---HE-PRGKYSGNADAAGAGDDVRS-GVGGMK--DEFAD--A

```



Sb02g030660\_XP\_002462710 KEKHALLKQLEKLAEML---HE-PRGKYGGNAD-AGAGDDVRS-GVGGMK--EEFTDA-A  
Zmhdz12\_NM\_001156038 DEKRALLKQLEKLAEML---HEPPQGYGG-----NADDVRSGGVGGTKEEEESTDACA  
Oshox6\_AK103160 KEKLALIKQLEKLAEML---QE-PRGKYGDN-----AGDDARSGGVAGMK-KEEFVGAGG  
TaHdZipI-3\_KT224374 KDKQALLNQLEKLAEML---RE-PGGAKCGDNAGAAARDVRL-AVAGMSMKDEFVDAGG  
.\* : \* : : .\*

AtHB7\_AY091364 AVVALSSTHHESENEENRRRKPEEVRPEMEMKDDKGH-HGVMCDHHDYE-----DDDNG  
AtHB12\_AY087187 GLALSSST--ESHNG-----KSEPEGRLDQG---SVLC-----NDGD  
Zmhdz4\_KJ728250 TMASSSSC--IGGGGEEEA-----EDDKRN--VLLFGCVDMEPPAESCVL-VG  
Oshox22\_AY224440 TAASSSSC--NGSGSEVDD-----DDDKRN---AAAGCLDLEPP-ESCVL-GG  
TaHdZipI-5\_KT224376 ATASSSSC--NGGGREL-----DDDKRN-----VVDVEPP-ESCVL-GG  
Zmhdz6\_EU972354 ----SGSC--EVNDAAEA-----ADDKRN-NSTSS-----LVQ-DD  
Sb04g033380\_XP\_002452838 ----SGSC--EVNDAA-----DDGKRNLNSTTTTCLV-----LVQ-ED  
Oshox24\_AK063685 ----SGSC--DGGGAEGD-----DDDKRN--SVMNASS-----GLVE-ED  
TaHdZipI-4\_KT224375 ----SASC--D---AAAE-----VDDKSN-NVSSC-----IVA-KD  
Zmhdz9\_BT087258 GAAPYSSE--GGGGG-----KF-AHF-TDDDV---GALFRPSS-----PQPSA--AG  
Sb02g030660\_XP\_002462710 GAALYSSE--GGGGG-----KF-AHF-TDDDV---GALFRPSA-----QPTA--AG  
Zmhdz12\_NM\_001156038 GAALYSSE--CAGGG-----RFIAHFLADDDVGA-ALFRPPSS-----PQPTA--GL  
Oshox6\_AK103160 AATLYSSA--EGGGTTTTTTA--KLMPHF-GSDDVDA-GLFLRPSSQHHPPPHAG--AG  
TaHdZipI-3\_KT224374 ASKLYSAS--EGCGSG-----KL-SLF-GEDDDDA-GLFLRPSL-----QLPTAHDGG  
: :

AtHB7\_AY091364 YS-----NNIKREYFG-----GFEEEPD--H-LMNIVEPA-DSCLTSSDDWRGFKSD  
AtHB12\_AY087187 YN-----NNIKTEYF-----GFEEETD--HELMNIVEKADDSCLTSSSENWGGFNSD  
Zmhdz4\_KJ728250 ST-CAALA---DVSV-----ESECDDQH-LH-----YDDE  
Oshox22\_AY224440 AT-CATPA---DVSVE-----SDQCDD-Q-LD-----YDEG  
TaHdZipI-5\_KT224376 TA-CGTPA---DVSAS-----VESECDD-H-LH-----YDGA  
Zmhdz6\_EU972354 GA-TPPPA-AVDA--SEDSAAT---GEYYD--H-VA-----YEYD  
Sb04g033380\_XP\_002452838 DG-ATPPA-AVDASGSEDSAAATEYGYDYD--HVVA-----YGEG  
Oshox24\_AK063685 YV-SCLAVPVVDV--SEDGSAACGSSYEYDH-H-LD-----YLGG  
TaHdZipI-4\_KT224375 ES-AAPAA---DV---SDGSTP---GWYEYDN-H-LA-----YGVD  
Zmhdz9\_BT087258 FT-SSGPP---EHQ-----PFQF-H-SG-----C-----WPSS  
Sb02g030660\_XP\_002462710 FTSSSGPP---EHQ-----PFQF-H-SS-----SC-----WPSS  
Zmhdz12\_NM\_001156038 LT-SSGPP---EHQ-----PFQF-H-SG-----CC-----WPSS  
Oshox6\_AK103160 FT-SSEPA---ADHQ-----SFNF-H-SS-----WPSS  
TaHdZipI-3\_KT224374 FT-ASGPA---EYQQQ-----SPSSFPP-H-SN-----WPSS  
: : :

AtHB7\_AY091364 TTTLLDQSSNYP-WRDF-WS-----  
AtHB12\_AY087187 --SLLDQSSSNYPNWWEF-WS-----  
Zmhdz4\_KJ728250 ---FPES-YCAMPPELWEP-WPL--VEWNAVA  
Oshox22\_AY224440 L--FPES-FCATPELWEP-WPL--VEWNAVA  
TaHdZipI-5\_KT224376 V--FPES-FCATPELWEP-WPWPPEWNAVA  
Zmhdz6\_EU972354 G--LHDPFVCATPDLWDT-WPL--LEWNAVA  
Sb04g033380\_XP\_002452838 ---LHDP-LCATPDLWDT-WPL--LEWNAVA  
Oshox24\_AK063685 G-QLPDP-FCGMPDLWEI-WPM--VEWNAVA  
TaHdZipI-4\_KT224375 ---LQEP-FCATPELWETS WPL--VEWNAVA  
Zmhdz9\_BT087258 ----TEQ-TCSSSQWWEF-ESL--SE-----  
Sb02g030660\_XP\_002462710 ---TTEQ-TCSSSQWWEF-ESL--SE-----  
Zmhdz12\_NM\_001156038 ---SAEQ-TCSGSQWWEF-ESL--SE-----  
Oshox6\_AK103160 ----TEQ-TCSSTPWWEF-ESE-----  
TaHdZipI-3\_KT224374 ---AAEQ-TCSSSQWWEF-ESP--SE-----  
: . :

**Table S3.** Hydrogen bonds in homo-dimeric TaHDZipI-3 and TaHDZipI-5, and hetero-dimeric TaHDZipI-3/TaHDZipI-5 with HDZ1 (5'-CAATCATTGC-3'/5'-GCAATGATTG-3').

| Number of hydrogen bonds and distances in Å <sup>1</sup> |                                          |          |          |          |              |          |          |          |              |                             |              |
|----------------------------------------------------------|------------------------------------------|----------|----------|----------|--------------|----------|----------|----------|--------------|-----------------------------|--------------|
| Residues                                                 | HDZ1 (5'-CAATCATTGC-3'/5'-GCAATGATTG-3') |          |          |          |              |          |          |          | Water        | DNA phosphodiester backbone | Total number |
|                                                          | A2                                       | A3       | T4       | T7       | T8           | G11      | T15      | G16      |              |                             |              |
| TaHDZipI-3                                               |                                          |          |          |          |              |          |          |          |              |                             |              |
| Gln66                                                    | -                                        | -        | -        | -        | -            | -        | -        | -        | 1 (3.0)      | -                           | 1            |
| Asn73                                                    | -                                        | -        | -        | -        | 2 (3.0, 3.4) | -        | -        | -        | 1 (2.8)      | -                           | 3            |
| Lys79                                                    | -                                        | -        | -        | -        | -            | -        | -        | -        | -            | 1 (3.4)                     | 1            |
| TaHDZipI-3                                               |                                          |          |          |          |              |          |          |          |              |                             |              |
| Gln66                                                    | -                                        | -        | -        | -        | -            | -        | -        | -        | 2 (3.0, 2.8) | 2 (3.4, 3.4)                | 4            |
| Gln72                                                    | -                                        | -        | 1 (3.2)  | -        | -            | -        | -        | -        | -            | -                           | 1            |
| Asn73                                                    | 1 (3.5)                                  | -        | -        | -        | -            | -        | -        | -        | -            | -                           | 1            |
| <b>Total</b>                                             | <b>1</b>                                 | <b>0</b> | <b>1</b> | <b>0</b> | <b>2</b>     | <b>0</b> | <b>0</b> | <b>0</b> | <b>4</b>     | <b>3</b>                    | <b>11</b>    |

| Number of hydrogen bonds and distances in Å <sup>1</sup> |                                          |              |          |          |          |          |          |          |          |                             |              |
|----------------------------------------------------------|------------------------------------------|--------------|----------|----------|----------|----------|----------|----------|----------|-----------------------------|--------------|
| Residues                                                 | HDZ1 (5'-CAATCATTGC-3'/5'-GCAATGATTG-3') |              |          |          |          |          |          |          | Water    | DNA phosphodiester backbone | Total number |
|                                                          | A2                                       | A3           | T4       | T7       | T8       | G11      | T15      | G16      |          |                             |              |
| TaHDZipI-5                                               |                                          |              |          |          |          |          |          |          |          |                             |              |
| Arg58                                                    | -                                        | -            | -        | 1 (2.9)  | -        | -        | -        | 1 (3.5)  | -        | -                           | 2            |
| Gln99                                                    | -                                        | -            | -        | -        | -        | -        | -        | -        | 1 (3.0)  | 1 (2.6)                     | 2            |
| Gln105                                                   | -                                        | -            | -        | -        | 1 (3.4)  | -        | -        | -        | 1 (3.1)  | -                           | 2            |
| Asn106                                                   | -                                        | -            | -        | -        | 1 (3.4)  | -        | -        | -        | 1 (3.2)  | -                           | 2            |
| TaHDZipI-5                                               |                                          |              |          |          |          |          |          |          |          |                             |              |
| Arg60                                                    | -                                        | -            | -        | -        | -        | -        | -        | -        | -        | 1 (2.3)                     | 1            |
| Gln99                                                    | -                                        | -            | -        | -        | -        | -        | -        | -        | 1 (3.0)  | 1 (3.3)                     | 2            |
| Asn106                                                   | -                                        | 2 (3.0, 3.1) | -        | -        | -        | -        | -        | -        | 1 (2.8)  | -                           | 3            |
| <b>Total</b>                                             | <b>0</b>                                 | <b>2</b>     | <b>0</b> | <b>1</b> | <b>2</b> | <b>0</b> | <b>0</b> | <b>1</b> | <b>5</b> | <b>3</b>                    | <b>14</b>    |

| Number of hydrogen bonds and distances in Å <sup>1</sup> |                                          |              |          |          |          |          |          |          |              |                             |              |
|----------------------------------------------------------|------------------------------------------|--------------|----------|----------|----------|----------|----------|----------|--------------|-----------------------------|--------------|
| Residues                                                 | HDZ1 (5'-CAATCATTGC-3'/5'-GCAATGATTG-3') |              |          |          |          |          |          |          | Water        | DNA phosphodiester backbone | Total number |
|                                                          | A2                                       | A3           | T4       | T7       | T8       | G11      | T15      | G16      |              |                             |              |
| TaHDZipI-3                                               |                                          |              |          |          |          |          |          |          |              |                             |              |
| Arg26                                                    | -                                        | -            | -        | 1 (3.1)  | -        | -        | 1 (3.5)  | -        | -            | -                           | 2            |
| Lys27                                                    | -                                        | -            | -        | -        | -        | -        | -        | 1 (3.0)  | -            | -                           | 1            |
| Arg65                                                    | -                                        | -            | -        | -        | -        | -        | -        | -        | -            | 1 (3.2)                     | 1            |
| Gln66                                                    | -                                        | -            | -        | -        | -        | -        | -        | -        | 1 (3.0)      | 2 (2.6, 3.2)                | 3            |
| Gln72                                                    | -                                        | -            | -        | -        | 1 (3.4)  | 1 (2.9)  | -        | -        | 1 (2.8)      | -                           | 3            |
| Asn73                                                    | -                                        | -            | -        | -        | 1 (2.3)  | -        | -        | -        | 1 (3.2)      | -                           | 2            |
| Arg77                                                    | -                                        | -            | -        | -        | -        | -        | -        | -        | -            | 1 (3.2)                     | 1            |
| TaHDZipI-5                                               |                                          |              |          |          |          |          |          |          |              |                             |              |
| Arg60                                                    | -                                        | -            | -        | -        | -        | -        | -        | -        | -            | 1 (2.8)                     | 1            |
| Gln99                                                    | -                                        | -            | -        | -        | -        | -        | -        | -        | 2 (3.0, 3.2) | 1 (3.4, 3.4)                | 3            |
| Asn106                                                   | 1 (2.9)                                  | 2 (3.2, 3.3) | -        | -        | -        | -        | -        | -        | 1 (2.8)      | -                           | 4            |
| Arg110                                                   | -                                        | -            | -        | -        | -        | -        | -        | -        | -            | 1 (3.1)                     | 1            |
| <b>Total</b>                                             | <b>1</b>                                 | <b>2</b>     | <b>0</b> | <b>1</b> | <b>2</b> | <b>1</b> | <b>1</b> | <b>1</b> | <b>6</b>     | <b>7</b>                    | <b>22</b>    |

**Table S4.** Characteristics of the T<sub>2</sub>/T<sub>3</sub> progenies of *TaHDZipI-5* transgenic lines analysed in large containers under well-watered or mild drought condition.

| Construct                 | Container No. | Condition    | Lines  | Total number of plants | Number of dead plants | Number of nulls | Number of plants with expressed transgene |
|---------------------------|---------------|--------------|--------|------------------------|-----------------------|-----------------|-------------------------------------------|
| <b>pUbi-TaHDZipI-5</b>    | 17            | Drought      | WT     | 16                     | 0                     | -               | -                                         |
|                           |               |              | L1-3-9 | 16                     | 3                     | 0               | 13                                        |
|                           |               |              | L2-7-9 | 16                     | 0                     | 0               | 16                                        |
|                           |               |              | L4-8-9 | 16                     | 0                     | 0               | 16                                        |
|                           | 18            | Well-watered | WT     | 16                     | 0                     | -               | -                                         |
|                           |               |              | L1-3-9 | 16                     | 3                     | 0               | 13                                        |
|                           |               |              | L2-7-9 | 16                     | 0                     | 0               | 16                                        |
|                           |               |              | L4-8-9 | 16                     | 0                     | 0               | 16                                        |
| <b>pWRKY71-TaHDZipI-5</b> | 21            | Drought      | WT     | 16                     | 0                     | -               | -                                         |
|                           |               |              | L14-7  | 16                     | 0                     | 4               | 12                                        |
|                           |               |              | L46-3  | 16                     | 0                     | 3               | 13                                        |
|                           |               |              | L48-7  | 16                     | 0                     | 5               | 11                                        |
|                           | 22            | Well-watered | WT     | 16                     | 0                     | -               | -                                         |
|                           |               |              | L14-7  | 16                     | 0                     | 2               | 14                                        |
|                           |               |              | L46-3  | 16                     | 2                     | 1               | 13                                        |
|                           |               |              | L48-7  | 16                     | 0                     | 8               | 8                                         |
| <b>pCor39-TaHDZipI-5</b>  | 23            | Drought      | WT     | 16                     | 0                     | -               | -                                         |
|                           |               |              | L23-4  | 16                     | 1                     | 4               | 11                                        |
|                           |               |              | L39-7  | 16                     | 0                     | 0               | 16                                        |
|                           |               |              | L55-4  | 16                     | 0                     | 6               | 10                                        |
|                           | 24            | Well-watered | WT     | 16                     | 0                     | -               | -                                         |
|                           |               |              | L23-4  | 16                     | 4                     | 0               | 12                                        |
|                           |               |              | L39-7  | 16                     | 0                     | 0               | 16                                        |
|                           |               |              | L55-4  | 16                     | 0                     | 2               | 14                                        |
